# Supplementary material for: Reconstructing five decades of sediment export from two glaciated high-alpine catchments in Tyrol, Austria, using nonparametric regression
Source: Copernicus journal article supplement (doi:10.5194/egusphere-2022-616), 2022-08-29
Supplement: Supplementary file [file egusphere-2022-616-AC1-supplement.pdf]

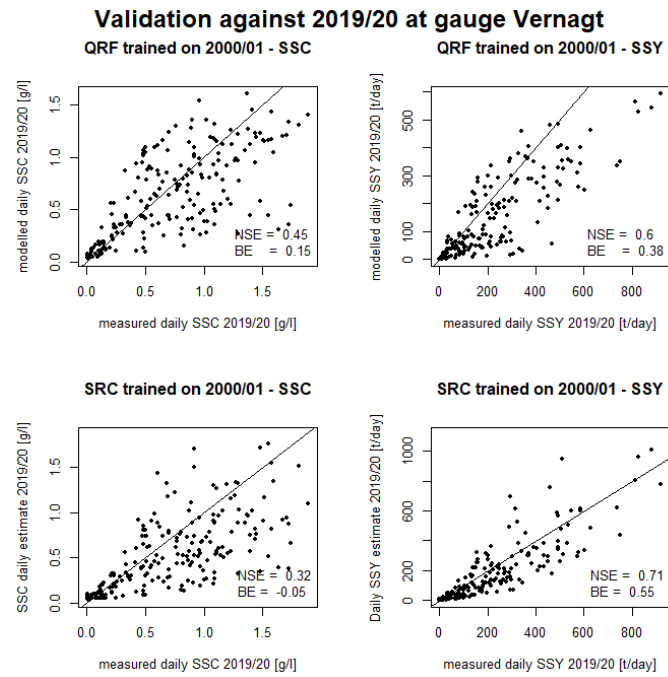

Figure 1 Validation of QRF models and sediment rating curves trained on 2000 and 2001 data against 2019/20 data. Top: QRF; Bottom: Sediment rating curve; Left: SSC estimates; right: SSY estimates.
