# Supplementary material for: Reconstructing five decades of sediment export from two glaciated high-alpine catchments in Tyrol, Austria, using nonparametric regression
Source: Copernicus journal article supplement (doi:10.5194/egusphere-2022-616), 2022-08-29
Supplement: Supplementary file [file egusphere-2022-616-AC2-supplement.pdf]

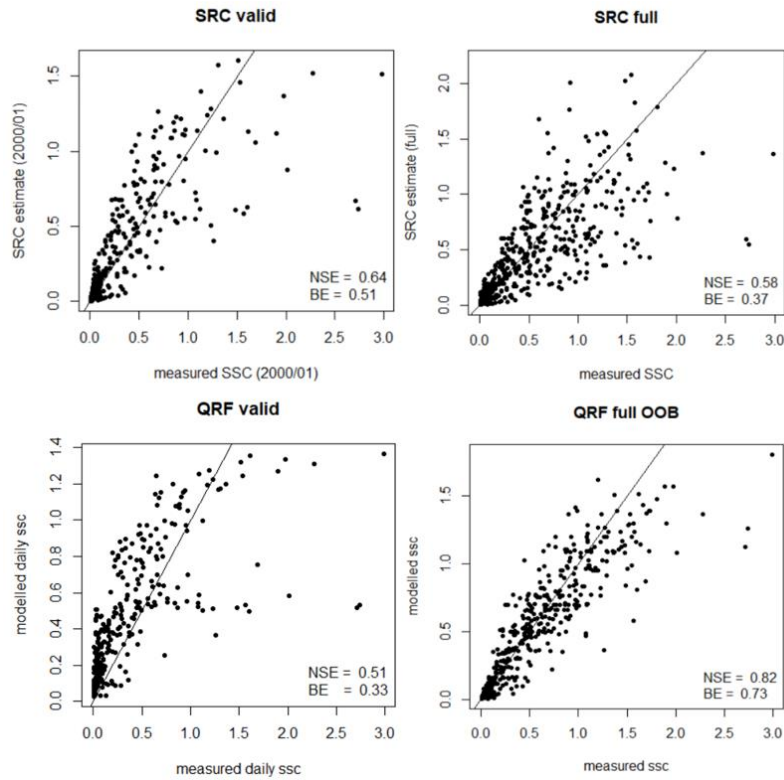

Figure 1 Comparison of sediment rating curve to QRF performance when both are trained solely on daily data from 2000/01 (left) and on all available training data (2000, 2001, 2019, 2020; right).

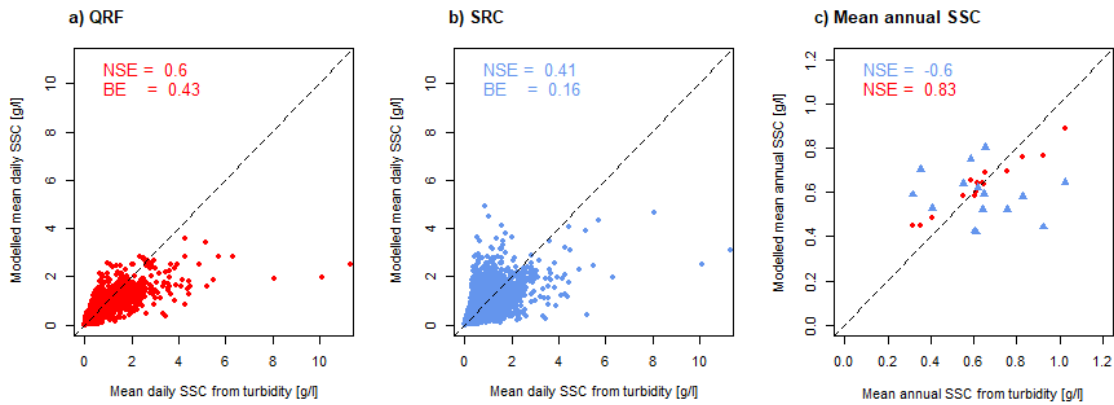

Figure 2 Performance of QRF (a) and sediment rating curves (b) compared to mean daily SSC derived from turbidity measurements at gauge Vent. Panel c) shows mean annual SSC estimates based on QRF (red circles) and SRC (blue triangles).

Table 1 Results of cross validation at gauge Vent with respect to mean daily SSC given as nash-sutcliffe efficiency (NSE) of out-of-bag predictions of the full model (Nash\_OOB\_full), for each 1/5 of the time series in the cross validation ("nash1" to "nash5") and the mean NSE of the 5 cross validation periods.

| nash_OOB_full | nash1 | nash2 | nash3 | nash4 | nash5 | meanNS |
|---------------|-------|-------|-------|-------|-------|--------|
| 0.61          | 0.48  | 0.55  | 0.21  | 0.69  | 0.39  | 0.46   |
