# Supplementary material for: Reconstructing five decades of sediment export from two glaciated high-alpine catchments in Tyrol, Austria, using nonparametric regression
Source: Copernicus journal article supplement (doi:10.5194/egusphere-2022-616), 2022-08-29
Supplement: Supplementary file [file egusphere-2022-616-AC3-supplement.pdf]

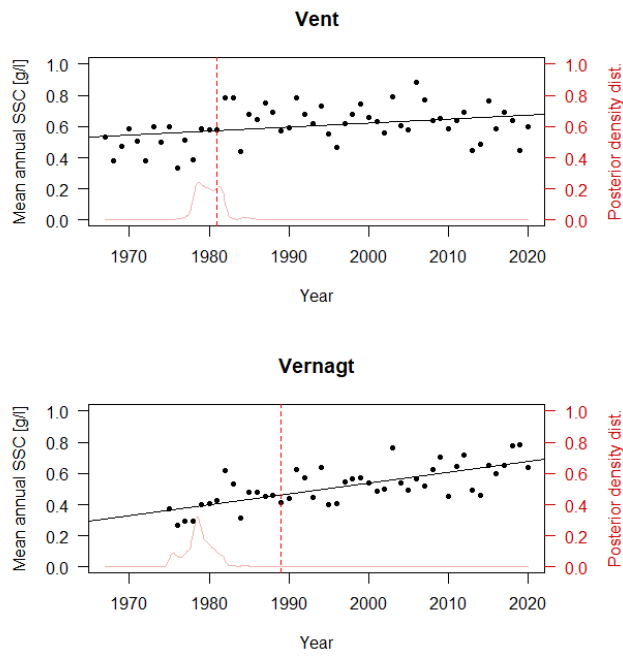

Figure 1 Mean annual SSC estimates over time with change points determined by Pettitt test (dashed) and with the mcp package (solid line).

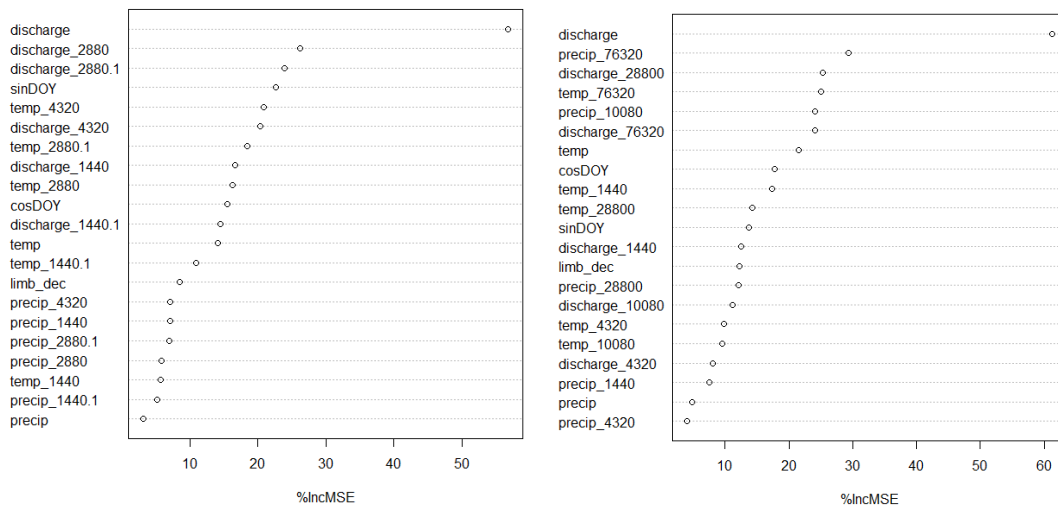

Figure 2 Left: Variable importance at gauge Vent. Right: Variable importance at gauge Vernagt
